# Supplementary material
Source: ML conference proceedings conference paper supplement (https://openreview.net/forum?id=PYnSpt3jAz)
Supplement: supplementary_material [file attachment]

## 1 A Proof of Lemma 1

2 *Proof.* Given the number of clean samples  $n$ , for any learner  $f \in \mathcal{F}$ , the accuracy of  $f$  on  $x_0$  is:

$$\begin{aligned} Pr[f_{D_n}(x_0) = y_0] &= Pr[(x_0, y_0) \in D_n] \cdot Pr[f_{D_n}(x_0) = y_0 \mid (x_0, y_0) \in D_n] \\ &\quad + Pr[(x_0, y_0) \notin D_n] \cdot Pr[f_{D_n}(x_0) = y_0 \mid (x_0, y_0) \notin D_n], \end{aligned} \quad (1)$$

3 where  $Pr[(x_0, y_0) \in D_n] = 1 - (1 - 1/k)^n$  and  $Pr[(x_0, y_0) \notin D_n] = (1 - 1/k)^n$ .

4 Since the bijection  $g$  is unknown to the learner  $f$ , when  $(x_0, y_0) \notin D_n$ , by symmetry the optimal  
5 prediction is predicting an arbitrary label that is not in  $D_n$ , thus

$$\begin{aligned} &Pr[f_{D_n}(x_0) = y_0 \mid (x_0, y_0) \notin D_n] \\ &\leq Pr[E \mid (x_0, y_0) \notin D_n] \cdot 1 + Pr[\neg E \mid (x_0, y_0) \notin D_n] \cdot \frac{1}{2} \\ &= Pr[E \mid (x_0, y_0) \notin D_n] \cdot \frac{1}{2} + \frac{1}{2} \\ &\leq \left(1 - \left(1 - \frac{1}{k-1}\right)^n\right) \cdot \frac{1}{2} + \frac{1}{2} \\ &= 1 - \left(1 - \frac{1}{k-1}\right)^n \cdot \frac{1}{2} \end{aligned}$$

6 where  $E$  denotes the event that all other  $k - 1$  labels appear in the training set  $D_n$ . Above, what  
7 we do is to divide the probability into two cases and bound them separately. Case 1 is when  
8  $E$  happens, where we simply upper bound the probability that  $f_{D_n}(x_0) = y_0$  by 1. Case 2 is  
9 when  $E$  does not happen, meaning that there is some  $y_1 \neq y_0$  that does not appear in  $D_n$ . By  
10 Definition 1, we have  $Pr[f_{D_n}(x_0) = y_0] = Pr[f_{T_{y_0 \leftrightarrow y_1}(D_n)}(x_0) = y_1] = Pr[f_{D_n}(x_0) = y_1]$  thus  
11  $Pr[f_{D_n}(x_0) = y_0] \leq \frac{1}{2}$ .

12 With Equation 1, we have

$$\begin{aligned} Pr[f_{D_n}(x_0) = y_0] &\leq Pr[(x_0, y_0) \in D_n] \cdot 1 + Pr[(x_0, y_0) \notin D_n] \cdot \left(1 - \left(1 - \frac{1}{k-1}\right)^n \cdot \frac{1}{2}\right) \\ &= 1 - Pr[(x_0, y_0) \notin D_n] \cdot \left(1 - \frac{1}{k-1}\right)^n \cdot \frac{1}{2} \\ &= 1 - \left(1 - \frac{1}{k}\right)^n \cdot \left(1 - \frac{1}{k-1}\right)^n \cdot \frac{1}{2}. \end{aligned}$$

13 Thus  $Pr[f_{D_n}(x_0) = y_0] \geq \tau \Rightarrow \left(1 - \frac{1}{k}\right)^n \cdot \left(1 - \frac{1}{k-1}\right)^n \leq 2 - 2\tau \Rightarrow n \geq \frac{\log(2-2\tau)}{\log(1-2/k)} = \Theta(k)$ .

14 The intuition behind the proof: If the training set contains  $(x_0, y_0)$ , the learner can obviously predict  
15 correctly; Otherwise, the best it can do is to guess a label that is not in the training set.  $\square$

## 16 B Proof of Lemma 2

17 *Proof.* Given  $x_0$ , for any  $N$  and any learner  $f$ , one of following two cases must be true:

18 **Case 1:** If  $Pr[f_{D_N}(x_0) = y_0] \leq \frac{1}{|Y|}$ , using the identity transform  $T(D) = D$  for all  $D \in \Omega^N$ , we  
19 have  $Pr[f_{T(D_N)}(x_0) = y_0] \leq \frac{1}{|Y|}$  and  $\mathbb{E}[|T(D_N) - D_N|] = 0$ .

20 **Case 2:** If  $Pr[f_{D_N}(x_0) = y_0] > \frac{1}{|Y|}$ , since  $\sum_{y \in Y} Pr[f_{D_N}(x_0) = y] = 1$ , there exists  $y_1 \neq y_0$   
21 such that  $Pr[f_{D_N}(x_0) = y_1] \leq \frac{1}{|Y|}$ . Let  $T = T_{y_0 \leftrightarrow y_1}$  be a transform swapping labels  $y_0$  and  $y_1$ ,  
22 i.e.  $T(D)$  is the same as  $D$  except that every  $(x, y_0) \in D$  will becomes  $(x, y_1) \in T(D)$  and every  
23  $(x, y_1) \in D$  will becomes  $(x, y_0) \in T(D)$ . Since  $T = T_{y_0 \leftrightarrow y_1}$  is a transform swapping labels  $y_0$   
24 and  $y_1$  in the training set,  $\mathbb{E}[|T(D_N) - D_N|]$  is in fact the expected number of samples with a label  
25 of  $y_0$  or  $y_1$ , which is  $\frac{2N}{k}$ . Thus we have  $Pr[f_{T(D_N)}(x_0) = y_0] = Pr[f_{D_N}(x_0) = y_1] \leq \frac{1}{|Y|}$  and  
26  $\mathbb{E}[|T(D_N) - D_N|] = \frac{2N}{k} = \Theta(\frac{1}{k}) \cdot N$ .

27 In both cases, we have a transform  $T$  that minimize the accuracy of  $f$  while in expectation altering  
 28 no more than  $\Theta(1/k)$  of the training set and therefore the proof completes. Note the underlying  
 29 assumption used in case 2 is that the Bijection  $g$  is unknown to learners in a sense that the output  
 30 distributions of  $f$  change accordingly when labels are permuted.  $\square$

### 31 C Proof of Lemma 3

32 *Proof.* Given the number of clean samples  $n$ , for any learner  $f \in \mathcal{F}$ , the accuracy of  $f$  on  $x_0$  is:

$$\begin{aligned} Pr[f_{D_n}(x_0) = y_0] &= Pr[(x_0, y_0) \in D_n] \cdot Pr[f_{D_n}(x_0) = y_0 \mid (x_0, y_0) \in D_n] \\ &\quad + Pr[(x_0, y_0) \notin D_n] \cdot Pr[f_{D_n}(x_0) = y_0 \mid (x_0, y_0) \notin D_n], \end{aligned} \quad (2)$$

33 where  $Pr[(x_0, y_0) \in D_n] = 1 - (1 - 1/m)^n$  and  $Pr[(x_0, y_0) \notin D_n] = (1 - 1/m)^n$ .

34 Since  $g$  is a mapping that assigns labels independently to different inputs and it is unknown to learners,  
 35 we have  $Pr[f_{D_n}(x_0) = y_0 \mid (x_0, y_0) \notin D_n] \leq \frac{1}{k}$  and therefore with Equation 2, we have

$$\begin{aligned} Pr[f_{D_n}(x_0) = y_0] &\leq Pr[(x_0, y_0) \in D_n] \cdot 1 + Pr[(x_0, y_0) \notin D_n] \cdot \frac{1}{k} \\ &= 1 - Pr[(x_0, y_0) \notin D_n] \cdot \left(1 - \frac{1}{k}\right) \\ &= 1 - \left(1 - \frac{1}{m}\right)^n \cdot \left(1 - \frac{1}{k}\right). \end{aligned}$$

36 Thus  $Pr[f_{D_n}(x_0) = y_0] \geq \tau \Rightarrow \left(1 - \frac{1}{m}\right)^n \leq \frac{k(1-\tau)}{k-1} \Rightarrow n \geq \frac{\log(1-\tau) + \log(1+1/(k-1))}{\log(1-1/m)} = \Theta(m)$ .

37 The intuition behind the proof: If the training set contains  $(x_0, y_0)$ , the most data-efficient learner  
 38 will memorize it to predict correctly; Otherwise it can do nothing but guess an arbitrary label.  $\square$

### 39 D Proof of Lemma 4

40 *Proof.* Given  $x_0$ , for any  $N$  and any learner  $f$ , we let  $T$  be a transform that obtain the poisoned  
 41 training set  $T(D)$  by removing all  $(x_0, y_0)$  from the clean training set  $D$ . By definition of Instance  
 42 Memorization, there is no information regarding  $y_0$  contained in  $T(D_N)$  and therefore we have  
 43  $Pr[f_{T(D_N)}(x_0) = y_0] \leq \frac{1}{|Y|}$  given that the mapping  $g$  is unknown to learners. Meanwhile, we  
 44 have  $\mathbb{E}[|T(D_N) - D_N|] = \frac{N}{m} = \Theta(\frac{1}{m}) \cdot N$ .  $\square$

### 45 E Proof of Theorem 1

46 *Proof.* First we introduce Coupling Lemma as a tool.

47 **Coupling Lemma [19]:** For two distributions  $U$  and  $V$  over  $\Omega$ , a coupling  $W$  is a distribution over  
 48  $\Omega \times \Omega$  such that the marginal distributions are the same as  $U$  and  $V$ , i.e.  $U(u) = \int_{v \in \Omega} W(u, v) dv$   
 49 and  $V(v) = \int_{u \in \Omega} W(u, v) du$ . The lemma states that for two distributions  $U$  and  $V$ , there exists a  
 50 coupling  $W$  such that  $Pr_{(u,v) \sim W}[u \neq v] = \delta(U, V)$ .

51 Intuitively, Coupling Lemma suggests there is a correspondence between the two distributions  $U$  and  
 52  $V$ , such that only the mass within their difference  $\delta(U, V)$  will correspond to different elements.

53 Through coupling lemma, there is a coupling  $W$  with  $Pr_{(u,v) \sim W}[u \neq v] = \delta(U, V)$ .

$$\begin{aligned} \mathbb{E}_{D \sim U^n}[f(D)] - \mathbb{E}_{D \sim V^n}[f(D)] &= \mathbb{E}_{(\forall 1 \leq i \leq n) (u_i, v_i) \sim W} [f(\{u_i\}_{i=1}^n) - f(\{v_i\}_{i=1}^n)] \\ &\leq Pr_{(\forall 1 \leq i \leq n) (u_i, v_i) \sim W} [(\exists i) u_i \neq v_i] \\ &\leq \sum_{i=1}^n Pr_{(u_i, v_i) \sim W} [u_i \neq v_i] \\ &= n \cdot \delta(U, V). \end{aligned}$$

54 The second line in the above inequalities is derived as follows: When  $u_i = v_i$  for all  $i$ , we have  
 55  $f(\{u_i\}_{i=1}^n) - f(\{v_i\}_{i=1}^n) = 0$ ; When there exists  $u_i \neq v_i$  for some  $i$ , we have  $f(\{u_i\}_{i=1}^n) -$   
 56  $f(\{v_i\}_{i=1}^n) \leq 1$  because the output of  $f$  is  $\{0, 1\}$ .

57 For the third line, we use the union bound. The probability that for at least one  $i$  we have  $u_i \neq v_i$  is  
 58 upper bounded by the sum of probability that  $u_i \neq v_i$  for all  $i$ .

59

□

## 60 F Proof of Theorem 2

61 *Proof.* Through coupling lemma, there is a coupling  $W$  with  $Pr_{(u,v) \sim W}[u \neq v] = \delta(U, V)$ . We  
 62 define the mapping  $T$  as follows: For any  $D = (u_1, \dots, u_N) \in \Omega^N$ , the output  $T(D) = (v_1, \dots, v_N)$   
 63 is obtained by drawing  $v_i$  from  $W(v | u)$  independently for  $i = 1 \dots N$ .

64 For  $i = 1 \dots N$ , we have  $P(v_i) = \int_{u_i \in \Omega} W(v_i | u_i) U(u_i) du_i = \int_{u_i \in \Omega} W(v_i | u_i) W(u_i) = V(v_i)$   
 65 and  $T(U^N)$  is the same distribution as  $V^N$ , meaning that  $\mathbb{E}_{D \sim U^N}[f(T(D))] - \mathbb{E}_{D \sim V^N}[f(D)] =$   
 66 0; Meanwhile, given  $Pr_{(u,v) \sim W}[u \neq v] = \delta(U, V)$ , we have  $\mathbb{E}_{D \sim U^N}[|T(D) - D|] =$   
 67  $\sum_{i=1}^N Pr_{u \sim U, v \sim W(v|u)}[u \neq v] = \sum_{i=1}^N Pr_{(u,v) \sim W}[u \neq v] = \delta(U, V) \cdot N$ . □

## 68 G Proof of Lemma 6

69 *Proof.* We will use Theorem 1. In order to have  $Pr[f_{D_n}(x_0) = y_0] \geq \tau$ , there must be some  
 70  $g : \Omega^{\mathbb{N}} \rightarrow \{0, 1\}$  discriminating  $U = \mathcal{N}(\mu_1, I)$  and  $V = \mathcal{N}(\mu'_1, I)$  with confidence larger than a  
 71 constant  $\tau'$  using in expectation  $n/k$  samples, where  $\mu'_1 = \mu_1 + (d_2 - d_1)/d_1 \cdot (1 + \epsilon)(\mu_1 - x_0)$  for  
 72 some  $\epsilon > 0$ . Note that  $\|\mu'_1 - \mu_1\| = (1 + \epsilon)(d_2 - d_1)$  and  $\|\mu'_1 - x_0\| > d_2$ . Taking  $\epsilon \rightarrow 0$ , we have  
 73  $n/k \geq \Theta(1/\delta(U, V)) = \Theta(1/\Delta) \Rightarrow n \geq \Theta(k/\Delta)$  using Theorem 1. □

## 74 H Proof of Lemma 7

75 *Proof.* We will use Theorem 2. Given  $x_0$ , for any  $N$  and any learner  $f$ , let  $\mu'_2 = \mu_2 - (d_2 - d_1)/d_2 \cdot$   
 76  $(1 + \epsilon)(\mu_2 - x_0)$  for some  $\epsilon > 0$ , as shown in Figure 1(b). With Theorem 2, there is a transform  $T'$   
 77 making  $U = \mathbb{N}(\mu_2, I)$  and  $V = \mathbb{N}(\mu'_2, I)$  indistinguishable. We define a transform  $T$  by applying  $T'$   
 78 to the inputs of all samples from class 2 while others remain unchanged.

79 Note that  $f \in \mathcal{F}$  and  $T(P)$  is also a plausible distribution (in a sense that it can be expressed in  
 80 the same form as Equation 1). Since  $\|\mu'_2 - x_0\| < d_1$ , we have  $Pr[f_{T(D_N)}(x_0) = y_0] \leq 1/k$ . In  
 81 addition, since  $\|\mu_2 - \mu'_2\| = (1 + \epsilon)(d_2 - d_1)$  and there are in expectation  $N/k$  samples from class  
 82 2, we have  $\mathbb{E}[|T(D_N) - D_N|] \leq \delta(U, V)/k = \Theta(\Delta/k)$  by taking  $\epsilon \rightarrow 0$ . □

83 **Intuition for taking  $\epsilon \rightarrow 0$ :** When  $\epsilon$  is actually 0, the distributions we construct for different classes  
 84 will be ‘symmetric’ to  $x_0$ , meaning that there will be a tie in defining the maximum likelihood  
 85 prediction. For any  $\epsilon > 0$ , the tie will be broken. By letting  $\epsilon \rightarrow 0$ , we find the tightest bound of the  
 86 number of poisoned samples needed from our construction.
